# Supplementary material for: Composite with TiO2 and extension of discharge voltage range for capacity enhancement of a Li4Ti5O12 battery
Source: Royal Society of Chemistry journal article supplement (doi:10.1039/c7ra07390a), 2017-01-01
Supplement: c7ra07390a1.pdf [file c7ra07390a1.pdf]

## Supporting Information

### Both Composite $\text{TiO}_2$ and Extending of discharge voltage Range for the Capacity

#### Enhancement of $\text{Li}_4\text{Ti}_5\text{O}_{12}$ battery

Meng Ding, Hui Liu\*, Xiangnan Zhao, Lingyan Pang\*, Lu Deng, Mengyan Li

School of Materials Science and Engineering, Shaanxi University of Science and  
Technology

Xi'an 710021, P. R. China

---

\*Corresponding author. Tel: +86-29-86177018; Fax: +86-29-86177018.  
Email address: [liuhui@sust.edu.cn](mailto:liuhui@sust.edu.cn) (Hui Liu)

\*Corresponding author. Tel: +86-29-86177018; Fax: +86-29-86177018.  
Email address: [hxplyl@126.com](mailto:hxplyl@126.com)

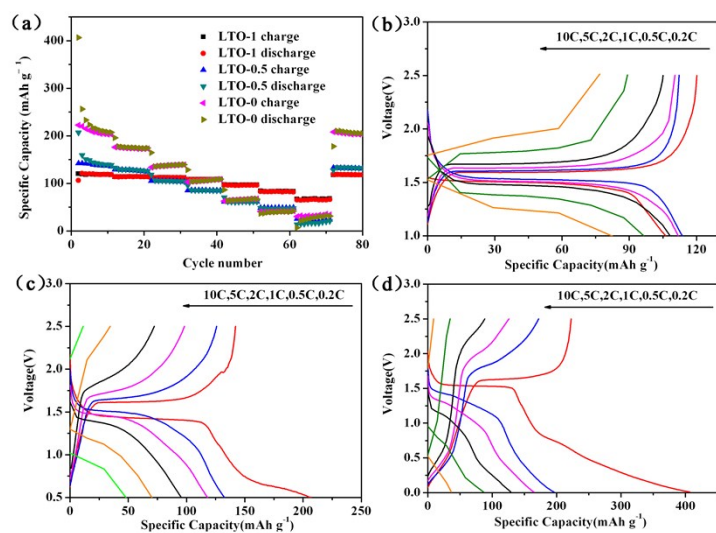

**Fig. S1.** (a) Rate performances of the LTO (LTO-1, LTO-0.5, and LTO-0) electrodes.

Typical charge/discharge curves of the LTO electrodes (b) LTO-1, (c) LTO-0.5, and

(d) LTO-0 at various current rates.

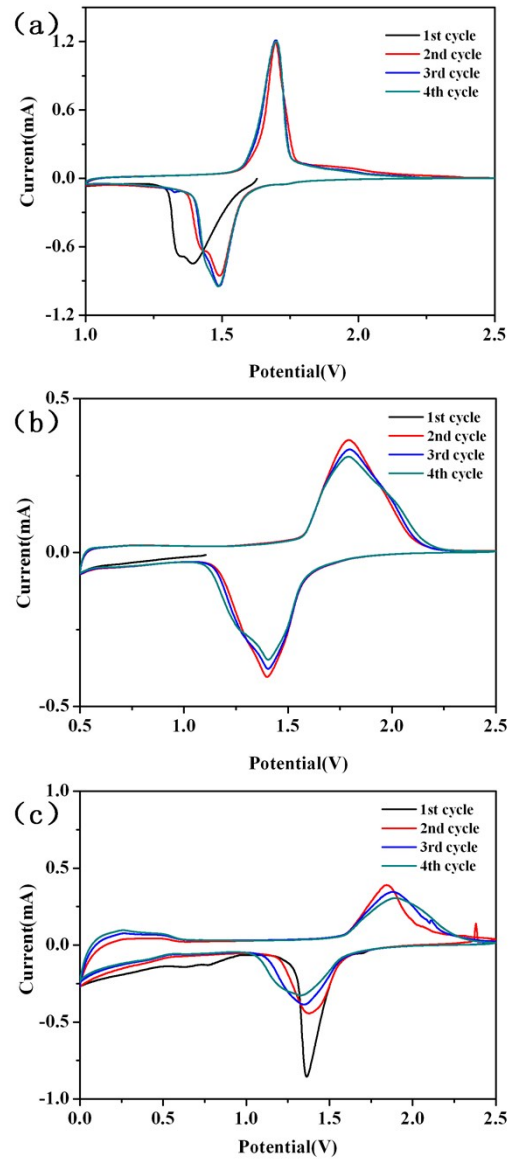

**Fig.S2.** CV curves of the LTO electrodes (a) LTO-1, (b) LTO-0.5, and (c) LTO-0 at a scan rate of 0.1 mV s<sup>-1</sup> between various voltage ranges.

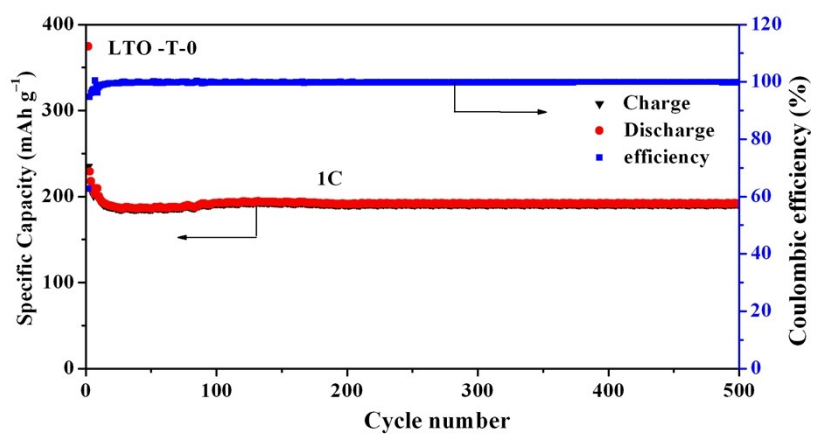

**Fig.S3.** Cycling performance and coulombic efficiency at a rates of 1 C for LTO-T-0.

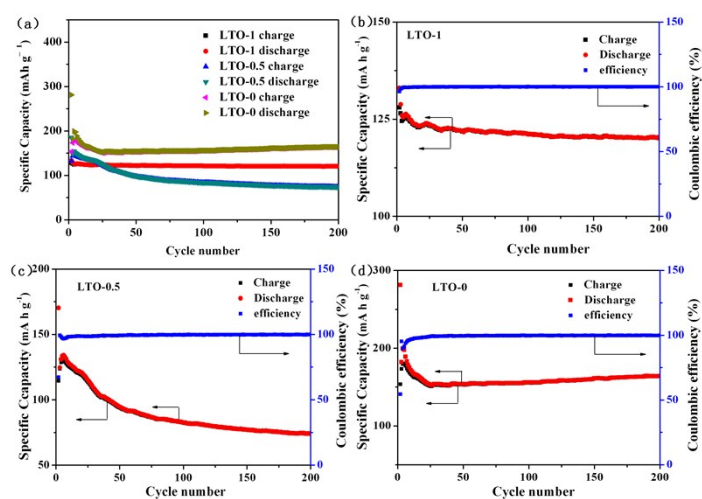

**Fig.S4.** (a) Cycling performance of the LTO electrodes (LTO-1, LTO-0.5, and LTO-0) at charge/discharge rates of 1 C, the coulomb efficiency of the LTO-TiO<sub>2</sub> electrodes, (LTO-1 (b), LTO-0.5 (c), and LTO-0 (d)).

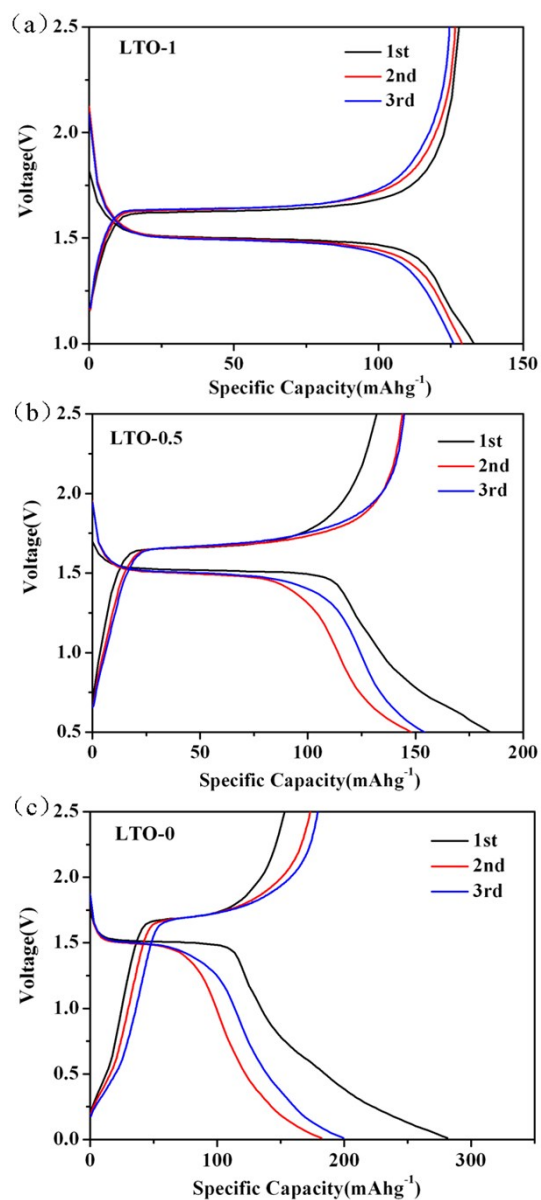

**Fig.S5.** Initial three discharge-charge curves of the LTO electrodes (LTO-1 (a), LTO-0.5 (b), and LTO-0 (c)) at charge-discharge rates of 1 C.
